# Supplementary material for: Phylogeny, body morphology, and trophic level shape intestinal traits in coral reef fishes
Source: PubMed Central journal article supplement (PMC8495780; doi:10.1002/ece3.8045), 2021-08-29

## Appendix S2: supplementary tables and figures

**Table 1** Number of individuals per species collected from three different habitats.

| Family         | Species                         | Slope | Lagoon | Pass | Total |
|----------------|---------------------------------|-------|--------|------|-------|
| Acanthuridae   | <i>Acanthurus achilles</i>      | 12    | 0      | 0    | 12    |
| Acanthuridae   | <i>Acanthurus guttatus</i>      | 8     | 1      | 0    | 9     |
| Acanthuridae   | <i>Acanthurus lineatus</i>      | 7     | 0      | 2    | 9     |
| Acanthuridae   | <i>Acanthurus nigricans</i>     | 12    | 1      | 0    | 13    |
| Acanthuridae   | <i>Acanthurus nigrofuscus</i>   | 2     | 3      | 1    | 6     |
| Acanthuridae   | <i>Acanthurus nigros</i>        | 3     | 0      | 1    | 4     |
| Acanthuridae   | <i>Acanthurus olivaceus</i>     | 5     | 0      | 1    | 6     |
| Acanthuridae   | <i>Acanthurus pyroferus</i>     | 2     | 2      | 1    | 5     |
| Acanthuridae   | <i>Acanthurus thompsoni</i>     | 3     | 0      | 1    | 4     |
| Acanthuridae   | <i>Acanthurus triostegus</i>    | 5     | 8      | 2    | 15    |
| Acanthuridae   | <i>Ctenochaetus flavicauda</i>  | 4     | 0      | 2    | 6     |
| Acanthuridae   | <i>Ctenochaetus striatus</i>    | 2     | 3      | 0    | 5     |
| Acanthuridae   | <i>Naso brevirostris</i>        | 6     | 0      | 0    | 6     |
| Acanthuridae   | <i>Naso lituratus</i>           | 17    | 0      | 0    | 17    |
| Acanthuridae   | <i>Naso unicornis</i>           | 1     | 0      | 4    | 5     |
| Acanthuridae   | <i>Naso vlamingii</i>           | 3     | 0      | 2    | 5     |
| Acanthuridae   | <i>Zebrasoma scopas</i>         | 26    | 16     | 0    | 42    |
| Acanthuridae   | <i>Zebrasoma velifer</i>        | 4     | 0      | 5    | 9     |
| Aulostomidae   | <i>Aulostomus chinensis</i>     | 3     | 7      | 1    | 11    |
| Balistidae     | <i>Balistapus undulatus</i>     | 8     | 4      | 0    | 12    |
| Balistidae     | <i>Melichthys niger</i>         | 14    | 0      | 0    | 14    |
| Balistidae     | <i>Melichthys vidua</i>         | 10    | 2      | 0    | 12    |
| Balistidae     | <i>Odonus niger</i>             | 11    | 3      | 0    | 14    |
| Balistidae     | <i>Rhinecanthus aculeatus</i>   | 0     | 7      | 2    | 9     |
| Balistidae     | <i>Rhinecanthus lunula</i>      | 2     | 0      | 1    | 3     |
| Balistidae     | <i>Rhinecanthus rectangulus</i> | 6     | 0      | 3    | 9     |
| Balistidae     | <i>Sufflamen bursa</i>          | 6     | 6      | 0    | 12    |
| Blenniidae     | <i>Exallias brevis</i>          | 3     | 0      | 2    | 5     |
| Bothidae       | <i>Bothus mancus</i>            | 0     | 1      | 2    | 3     |
| Carangidae     | <i>Caranx melampyngus</i>       | 4     | 0      | 1    | 5     |
| Carangidae     | <i>Scomberoides lysan</i>       | 2     | 0      | 1    | 3     |
| Chaetodontidae | <i>Chaetodon auriga</i>         | 2     | 2      | 5    | 9     |
| Chaetodontidae | <i>Chaetodon bennetti</i>       | 0     | 0      | 3    | 3     |
| Chaetodontidae | <i>Chaetodon citrinellus</i>    | 3     | 2      | 2    | 7     |
| Chaetodontidae | <i>Chaetodon ephippium</i>      | 3     | 4      | 1    | 8     |
| Chaetodontidae | <i>Chaetodon lunula</i>         | 1     | 4      | 4    | 9     |
| Chaetodontidae | <i>Chaetodon lunulatus</i>      | 0     | 8      | 0    | 8     |

| Family         | Species                            | Slope | Lagoon | Pass | Total |
|----------------|------------------------------------|-------|--------|------|-------|
| Chaetodontidae | <i>Chaetodon mertensii</i>         | 0     | 1      | 4    | 5     |
| Chaetodontidae | <i>Chaetodon ornatissimus</i>      | 29    | 0      | 0    | 29    |
| Chaetodontidae | <i>Chaetodon pelewensis</i>        | 6     | 0      | 0    | 6     |
| Chaetodontidae | <i>Chaetodon quadrimaculatus</i>   | 6     | 0      | 2    | 8     |
| Chaetodontidae | <i>Chaetodon reticulatus</i>       | 32    | 0      | 0    | 32    |
| Chaetodontidae | <i>Chaetodon trichrous</i>         | 2     | 1      | 3    | 6     |
| Chaetodontidae | <i>Chaetodon trifascialis</i>      | 2     | 1      | 3    | 6     |
| Chaetodontidae | <i>Chaetodon ulietensis</i>        | 2     | 1      | 5    | 8     |
| Chaetodontidae | <i>Chaetodon unimaculatus</i>      | 5     | 3      | 1    | 9     |
| Chaetodontidae | <i>Chaetodon vagabundus</i>        | 4     | 9      | 0    | 13    |
| Chaetodontidae | <i>Forcipiger flavissimus</i>      | 2     | 6      | 0    | 8     |
| Chaetodontidae | <i>Forcipiger longirostris</i>     | 7     | 0      | 0    | 7     |
| Chaetodontidae | <i>Hemitaurichthys polylepis</i>   | 5     | 0      | 2    | 7     |
| Chaetodontidae | <i>Heniochus chrysostomus</i>      | 1     | 7      | 0    | 8     |
| Cirrhitidae    | <i>Cirrhitus pinnulatus</i>        | 6     | 0      | 4    | 10    |
| Cirrhitidae    | <i>Paracirrhites forsteri</i>      | 6     | 1      | 2    | 9     |
| Cirrhitidae    | <i>Paracirrhites hemistictus</i>   | 17    | 0      | 1    | 18    |
| Diodontidae    | <i>Diodon hystrix</i>              | 1     | 2      | 2    | 5     |
| Fistulariidae  | <i>Fistularia commersonii</i>      | 1     | 4      | 5    | 10    |
| Gobiidae       | <i>Valenciennea strigata</i>       | 0     | 5      | 1    | 6     |
| Hemiramphidae  | <i>Hemiramphus depauperatus</i>    | 1     | 2      | 0    | 3     |
| Holocentridae  | <i>Myripristis berndti</i>         | 1     | 15     | 0    | 16    |
| Holocentridae  | <i>Myripristis kuntee</i>          | 0     | 6      | 1    | 7     |
| Holocentridae  | <i>Myripristis violacea</i>        | 0     | 2      | 7    | 9     |
| Holocentridae  | <i>Neoniphon sammara</i>           | 0     | 12     | 0    | 12    |
| Holocentridae  | <i>Sargocentron caudimaculatum</i> | 0     | 7      | 0    | 7     |
| Holocentridae  | <i>Sargocentron spiniferum</i>     | 5     | 4      | 1    | 10    |
| Holocentridae  | <i>Sargocentron tiere</i>          | 5     | 5      | 1    | 11    |
| Kuhliidae      | <i>Kuhlia mugil</i>                | 2     | 0      | 1    | 3     |
| Kyphosidae     | <i>Kyphosus cinerascens</i>        | 0     | 0      | 3    | 3     |
| Kyphosidae     | <i>Kyphosus vaigiensis</i>         | 2     | 0      | 2    | 4     |
| Labridae       | <i>Calotomus carolinus</i>         | 3     | 2      | 4    | 9     |
| Labridae       | <i>Cheilinus chlorourus</i>        | 0     | 9      | 0    | 9     |
| Labridae       | <i>Cheilinus trilobatus</i>        | 1     | 6      | 0    | 7     |
| Labridae       | <i>Cheilio inermis</i>             | 0     | 0      | 4    | 4     |
| Labridae       | <i>Chlorurus microrhinos</i>       | 4     | 0      | 0    | 4     |
| Labridae       | <i>Chlorurus spilurus</i>          | 5     | 1      | 0    | 6     |
| Labridae       | <i>Coris aygula</i>                | 3     | 4      | 2    | 9     |
| Labridae       | <i>Coris gaimard</i>               | 5     | 0      | 2    | 7     |
| Labridae       | <i>Epibulus insidiator</i>         | 12    | 4      | 0    | 16    |

| Family        | Species                             | Slope | Lagoon | Pass | Total |
|---------------|-------------------------------------|-------|--------|------|-------|
| Labridae      | <i>Gomphosus varius</i>             | 4     | 3      | 0    | 7     |
| Labridae      | <i>Halichoeres hortulanus</i>       | 0     | 8      | 1    | 9     |
| Labridae      | <i>Halichoeres trimaculatus</i>     | 0     | 5      | 0    | 5     |
| Labridae      | <i>Hemigymnus fasciatus</i>         | 8     | 0      | 1    | 9     |
| Labridae      | <i>Novaculichthys taeniourus</i>    | 2     | 1      | 3    | 6     |
| Labridae      | <i>Oxycheilinus unifasciatus</i>    | 3     | 0      | 1    | 4     |
| Labridae      | <i>Scarus altipinnis</i>            | 6     | 0      | 0    | 6     |
| Labridae      | <i>Scarus forsteni</i>              | 8     | 1      | 0    | 9     |
| Labridae      | <i>Scarus frenatus</i>              | 2     | 2      | 0    | 4     |
| Labridae      | <i>Scarus globiceps</i>             | 1     | 2      | 4    | 7     |
| Labridae      | <i>Scarus oviceps</i>               | 6     | 1      | 0    | 7     |
| Labridae      | <i>Scarus psittacus</i>             | 0     | 6      | 3    | 9     |
| Labridae      | <i>Scarus rubroviolaceus</i>        | 2     | 0      | 3    | 5     |
| Labridae      | <i>Scarus schlegeli</i>             | 3     | 0      | 4    | 7     |
| Labridae      | <i>Thalassoma hardwicke</i>         | 0     | 7      | 0    | 7     |
| Labridae      | <i>Thalassoma purpureum</i>         | 4     | 1      | 0    | 5     |
| Labridae      | <i>Thalassoma trilobatum</i>        | 6     | 1      | 3    | 10    |
| Lethrinidae   | <i>Gnathodentex aureolineatus</i>   | 1     | 4      | 2    | 7     |
| Lethrinidae   | <i>Monotaxis grandoculis</i>        | 4     | 2      | 1    | 7     |
| Lutjanidae    | <i>Aphareus furca</i>               | 7     | 0      | 2    | 9     |
| Lutjanidae    | <i>Lutjanus fulvus</i>              | 3     | 6      | 2    | 11    |
| Lutjanidae    | <i>Lutjanus kasmira</i>             | 6     | 0      | 3    | 9     |
| Lutjanidae    | <i>Lutjanus monostigma</i>          | 2     | 0      | 3    | 5     |
| Monacanthidae | <i>Aluterus scriptus</i>            | 0     | 0      | 4    | 4     |
| Monacanthidae | <i>Amanses scopas</i>               | 8     | 0      | 1    | 9     |
| Monacanthidae | <i>Cantherhines sandwichiensis</i>  | 9     | 0      | 1    | 10    |
| Mugilidae     | <i>Ellochelon vaigiensis</i>        | 0     | 2      | 2    | 4     |
| Mullidae      | <i>Mulloidichthys flavolineatus</i> | 0     | 8      | 1    | 9     |
| Mullidae      | <i>Mulloidichthys vanicolensis</i>  | 1     | 1      | 3    | 5     |
| Mullidae      | <i>Parupeneus barberinus</i>        | 0     | 3      | 1    | 4     |
| Mullidae      | <i>Parupeneus insularis</i>         | 7     | 2      | 2    | 11    |
| Mullidae      | <i>Parupeneus multifasciatus</i>    | 3     | 8      | 0    | 11    |
| Ostraciidae   | <i>Ostracion cubicus</i>            | 0     | 1      | 2    | 3     |
| Ostraciidae   | <i>Ostracion meleagris</i>          | 0     | 5      | 2    | 7     |
| Pempheridae   | <i>Pempheris oualensis</i>          | 6     | 0      | 1    | 7     |
| Pinguipedidae | <i>Parapercis millepunctata</i>     | 0     | 7      | 0    | 7     |
| Pomacanthidae | <i>Centropyge flavissima</i>        | 4     | 2      | 2    | 8     |
| Pomacanthidae | <i>Centropyge loriculus</i>         | 3     | 0      | 0    | 3     |
| Pomacanthidae | <i>Pomacanthus imperator</i>        | 7     | 0      | 0    | 7     |
| Pomacanthidae | <i>Pygoplites diacanthus</i>        | 3     | 3      | 4    | 10    |

| <b>Family</b>  | <b>Species</b>                          | <b>Slope</b> | <b>Lagoon</b> | <b>Pass</b> | <b>Total</b> |
|----------------|-----------------------------------------|--------------|---------------|-------------|--------------|
| Pomacentridae  | <i>Abudefduf septemfasciatus</i>        | 1            | 8             | 2           | 11           |
| Pomacentridae  | <i>Abudefduf sexfasciatus</i>           | 0            | 8             | 1           | 9            |
| Pomacentridae  | <i>Abudefduf sordidus</i>               | 2            | 1             | 3           | 6            |
| Pomacentridae  | <i>Chromis atripectoralis</i>           | 0            | 3             | 2           | 5            |
| Pomacentridae  | <i>Chromis xanthura</i>                 | 22           | 0             | 2           | 24           |
| Pomacentridae  | <i>Dascyllus aruanus</i>                | 0            | 3             | 4           | 7            |
| Pomacentridae  | <i>Dascyllus flavicaudus</i>            | 9            | 5             | 0           | 14           |
| Pomacentridae  | <i>Dascyllus trimaculatus</i>           | 1            | 5             | 2           | 8            |
| Pomacentridae  | <i>Plectroglyphidodon johnstonianus</i> | 6            | 0             | 0           | 6            |
| Pomacentridae  | <i>Plectroglyphidodon lacrymatus</i>    | 6            | 0             | 0           | 6            |
| Pomacentridae  | <i>Stegastes fasciolatus</i>            | 6            | 0             | 3           | 9            |
| Pomacentridae  | <i>Stegastes nigricans</i>              | 0            | 7             | 3           | 10           |
| Scorpaenidae   | <i>Pterois radiata</i>                  | 3            | 5             | 1           | 9            |
| Serranidae     | <i>Cephalopholis argus</i>              | 15           | 1             | 1           | 17           |
| Serranidae     | <i>Cephalopholis urodeta</i>            | 13           | 0             | 1           | 14           |
| Serranidae     | <i>Epinephelus fasciatus</i>            | 5            | 0             | 1           | 6            |
| Serranidae     | <i>Epinephelus hexagonatus</i>          | 5            | 0             | 2           | 7            |
| Serranidae     | <i>Epinephelus merra</i>                | 0            | 8             | 1           | 9            |
| Serranidae     | <i>Pseudanthias pascalus</i>            | 5            | 0             | 2           | 7            |
| Serranidae     | <i>Variola louti</i>                    | 6            | 0             | 1           | 7            |
| Siganidae      | <i>Siganus spinus</i>                   | 2            | 3             | 0           | 5            |
| Tetraodontidae | <i>Arothron meleagris</i>               | 4            | 5             | 0           | 9            |
| Tetraodontidae | <i>Canthigaster bennetti</i>            | 0            | 3             | 0           | 3            |
| Tetraodontidae | <i>Canthigaster solandri</i>            | 0            | 5             | 1           | 6            |
| Zanclidae      | <i>Zanclus cornutus</i>                 | 8            | 3             | 0           | 11           |

**Fig. 1** Posterior predictive checks based on 100 posterior samples for Bayesian phylogenetic hierarchical linear models of (a) intestinal length, (b) diameter, and (c) surface area of coral reef fishes.

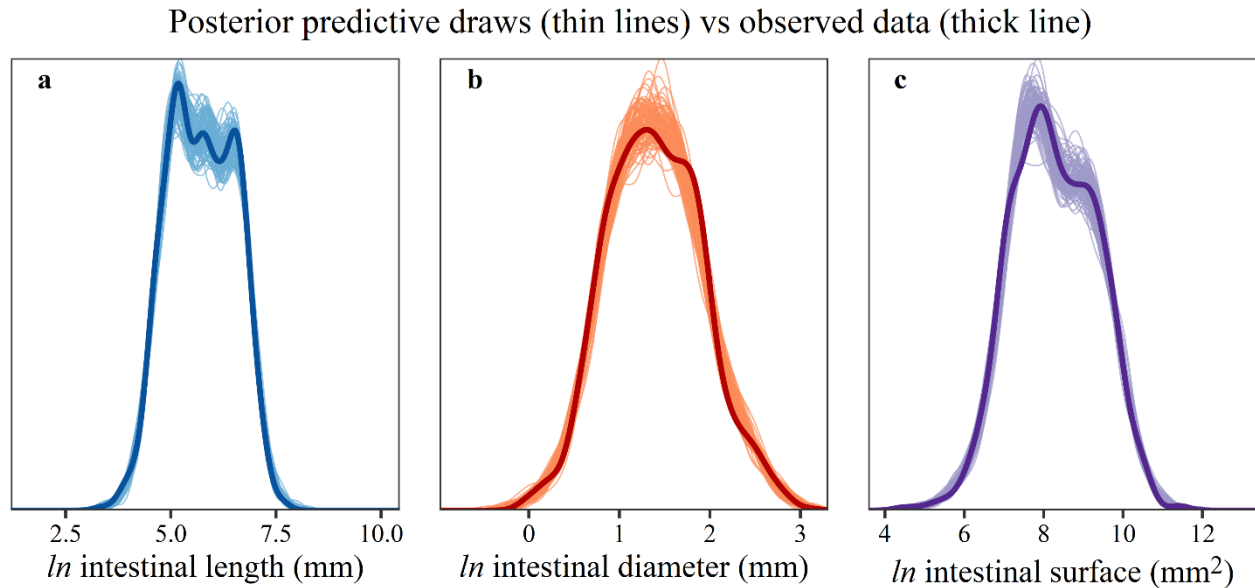

**Table 2** Posterior mean and 95% credible interval for each parameter of Bayesian phylogenetic hierarchical linear models of intestinal length, diameter, and surface area for 142 species of coral reef fishes with a minimum sample size of three individuals per species.  $\alpha$  = model intercept;  $\beta_{SL-inter}$  = scaled species mean standard length slope;  $\beta_{TL}$  = scaled trophic level slope;  $\beta_{SL-intra}$  = scaled species-mean-centred standard length slope;  $\beta_{EL}$  = scaled elongation slope;  $\beta_{ST}$  = stomach slope;  $\beta_{DU}$  = durophagy slope;  $\beta_{ST:DU}$  = stomach X durophagy slope;  $\sigma_{phy}$  = random intercept standard deviation, phylogenetic relationship;  $\sigma_{sp}$  = random intercept standard deviation, species;  $\sigma_{\beta sp}$  = random slope standard deviation, species;  $\sigma_{\epsilon}$  = residual standard deviation;  $\nu$  = degrees of freedom of student-t distribution.

| parameter           | Length |       |       | Diameter |       |       | Surface |       |       |
|---------------------|--------|-------|-------|----------|-------|-------|---------|-------|-------|
|                     | mean   | 2.5%  | 97.5% | mean     | 2.5%  | 97.5% | mean    | 2.5%  | 97.5% |
| $\alpha$            | 5.69   | 5.13  | 6.25  | 1.54     | 1.31  | 1.76  | 8.34    | 7.64  | 9.01  |
| $\beta_{SL-inter}$  | 0.42   | 0.35  | 0.49  | 0.40     | 0.36  | 0.45  | 0.81    | 0.71  | 0.90  |
| $\beta_{TL}$        | -0.26  | -0.36 | -0.16 | -0.11    | -0.17 | -0.05 | -0.38   | -0.55 | -0.21 |
| $\beta_{SL-intra}$  | 0.13   | 0.11  | 0.15  | 0.11     | 0.10  | 0.13  | 0.24    | 0.21  | 0.27  |
| $\beta_{EL}$        | -0.32  | -0.43 | -0.21 | -0.17    | -0.23 | -0.11 | -0.49   | -0.63 | -0.35 |
| $\beta_{ST}$        | -0.19  | -0.68 | 0.30  | -0.28    | -0.49 | -0.07 | -0.45   | -1.07 | 0.17  |
| $\beta_{DU}$        | -0.17  | -0.57 | 0.23  | 0.19     | -0.01 | 0.40  | 0.07    | -0.43 | 0.59  |
| $\beta_{ST:DU}$     | -0.05  | -0.81 | 0.70  | 0.04     | -0.29 | 0.37  | -0.06   | -0.99 | 0.84  |
| $\sigma_{phy}$      | 0.54   | 0.44  | 0.64  | 0.18     | 0.10  | 0.27  | 0.64    | 0.42  | 0.83  |
| $\sigma_{sp}$       | 0.07   | 0.00  | 0.16  | 0.15     | 0.11  | 0.19  | 0.19    | 0.02  | 0.33  |
| $\sigma_{\beta sp}$ | 0.06   | 0.04  | 0.08  | 0.04     | 0.02  | 0.07  | 0.10    | 0.07  | 0.13  |

| parameter         | Length |      |       | Diameter |      |       | Surface |      |       |
|-------------------|--------|------|-------|----------|------|-------|---------|------|-------|
|                   | mean   | 2.5% | 97.5% | mean     | 2.5% | 97.5% | mean    | 2.5% | 97.5% |
| $\sigma_\epsilon$ | 0.16   | 0.14 | 0.17  | 0.19     | 0.18 | 0.21  | 0.28    | 0.26 | 0.30  |
| $\nu$             | 4.52   | 3.34 | 6.25  | 15.96    | 7.27 | 37.44 | 12.51   | 6.63 | 26.09 |

**Table 3** Posterior mean and 95% credible interval for each parameter of Bayesian phylogenetic hierarchical linear models of intestinal length, diameter, and surface area for 122 species of coral reef fishes with a minimum sample size of five individuals per species.  $\alpha$  = model intercept;  $\beta_{SL-inter}$  = scaled species mean standard length slope;  $\beta_{TL}$  = scaled trophic level slope;  $\beta_{SL-intra}$  = scaled species-mean-centred standard length slope;  $\beta_{EL}$  = scaled elongation slope;  $\beta_{ST}$  = stomach slope;  $\beta_{DU}$  = durophagy slope;  $\beta_{ST:DU}$  = stomach X durophagy slope;  $\sigma_{phy}$  = random intercept standard deviation, phylogenetic relationship;  $\sigma_{sp}$  = random intercept standard deviation, species;  $\sigma_{\beta sp}$  = random slope standard deviation, species;  $\sigma_\epsilon$  = residual standard deviation;  $\nu$  = degrees of freedom of student-t distribution.

| parameter           | Length |       |       | Diameter |       |       | Surface |       |       |
|---------------------|--------|-------|-------|----------|-------|-------|---------|-------|-------|
|                     | mean   | 2.5%  | 97.5% | mean     | 2.5%  | 97.5% | mean    | 2.5%  | 97.5% |
| $\alpha$            | 5.77   | 5.17  | 6.37  | 1.56     | 1.31  | 1.81  | 8.44    | 7.65  | 9.22  |
| $\beta_{SL-inter}$  | 0.40   | 0.32  | 0.47  | 0.40     | 0.34  | 0.45  | 0.77    | 0.67  | 0.88  |
| $\beta_{TL}$        | -0.18  | -0.30 | -0.08 | -0.11    | -0.18 | -0.03 | -0.27   | -0.49 | -0.09 |
| $\beta_{SL-intra}$  | 0.13   | 0.12  | 0.15  | 0.11     | 0.10  | 0.13  | 0.25    | 0.22  | 0.28  |
| $\beta_{EL}$        | -0.33  | -0.45 | -0.21 | -0.17    | -0.24 | -0.11 | -0.50   | -0.67 | -0.34 |
| $\beta_{ST}$        | -0.33  | -0.87 | 0.22  | -0.30    | -0.55 | -0.06 | -0.62   | -1.36 | 0.11  |
| $\beta_{DU}$        | -0.26  | -0.68 | 0.17  | 0.16     | -0.06 | 0.39  | -0.04   | -0.61 | 0.52  |
| $\beta_{ST:DU}$     | 0.05   | -0.72 | 0.82  | 0.03     | -0.32 | 0.38  | 0.02    | -0.97 | 1.03  |
| $\sigma_{phy}$      | 0.54   | 0.46  | 0.63  | 0.18     | 0.09  | 0.29  | 0.68    | 0.46  | 0.86  |
| $\sigma_{sp}$       | 0.05   | 0.00  | 0.13  | 0.16     | 0.11  | 0.20  | 0.14    | 0.01  | 0.31  |
| $\sigma_{\beta sp}$ | 0.05   | 0.04  | 0.07  | 0.05     | 0.02  | 0.07  | 0.10    | 0.06  | 0.13  |
| $\sigma_\epsilon$   | 0.16   | 0.14  | 0.17  | 0.19     | 0.18  | 0.21  | 0.28    | 0.26  | 0.30  |
| $\nu$               | 4.54   | 3.35  | 6.21  | 15.58    | 7.18  | 36.07 | 12.15   | 6.39  | 25.13 |

**Table 4** Posterior mean and 95% credible interval for each parameter of Bayesian phylogenetic hierarchical linear models of intestinal length, diameter, and surface area for 69 species of coral reef fishes with a minimum sample size of eight individuals per species.  $\alpha$  = model intercept;  $\beta_{SL-inter}$  = scaled species mean standard length slope;  $\beta_{TL}$  = scaled trophic level slope;  $\beta_{SL-intra}$  = scaled species-mean-centred standard length slope;  $\beta_{EL}$  = scaled elongation slope;  $\beta_{ST}$  = stomach slope;  $\beta_{DU}$  = durophagy slope;  $\beta_{ST:DU}$  = stomach X durophagy slope;  $\sigma_{phy}$  = random intercept standard deviation, phylogenetic relationship;  $\sigma_{sp}$  = random

intercept standard deviation, species;  $\sigma_{\beta_{sp}}$  = random slope standard deviation, species;  $\sigma_{\epsilon}$  = residual standard deviation;  $\nu$  = degrees of freedom of student-t distribution.

| parameter             | Length |       |       | Diameter |       |       | Surface |       |       |
|-----------------------|--------|-------|-------|----------|-------|-------|---------|-------|-------|
|                       | mean   | 2.5%  | 97.5% | mean     | 2.5%  | 97.5% | mean    | 2.5%  | 97.5% |
| $\alpha$              | 5.49   | 4.73  | 6.26  | 1.63     | 1.30  | 1.99  | 8.34    | 7.39  | 9.29  |
| $\beta_{SL-inter}$    | 0.30   | 0.18  | 0.42  | 0.36     | 0.27  | 0.45  | 0.64    | 0.47  | 0.81  |
| $\beta_{TL}$          | -0.22  | -0.37 | -0.09 | -0.14    | -0.22 | -0.03 | -0.33   | -0.58 | -0.11 |
| $\beta_{SL-intra}$    | 0.14   | 0.11  | 0.16  | 0.11     | 0.09  | 0.13  | 0.25    | 0.21  | 0.28  |
| $\beta_{EL}$          | -0.35  | -0.52 | -0.19 | -0.18    | -0.28 | -0.08 | -0.53   | -0.77 | -0.31 |
| $\beta_{ST}$          | 0.12   | -0.64 | 0.89  | -0.32    | -0.69 | 0.02  | -0.27   | -1.23 | 0.67  |
| $\beta_{DU}$          | -0.02  | -0.57 | 0.54  | 0.09     | -0.23 | 0.39  | 0.02    | -0.70 | 0.75  |
| $\beta_{ST:DU}$       | -0.48  | -1.54 | 0.61  | 0.03     | -0.46 | 0.53  | -0.38   | -1.72 | 0.99  |
| $\sigma_{phy}$        | 0.53   | 0.42  | 0.66  | 0.17     | 0.03  | 0.35  | 0.66    | 0.40  | 0.86  |
| $\sigma_{sp}$         | 0.06   | 0.00  | 0.17  | 0.16     | 0.07  | 0.23  | 0.14    | 0.01  | 0.33  |
| $\sigma_{\beta_{sp}}$ | 0.06   | 0.04  | 0.09  | 0.05     | 0.02  | 0.08  | 0.10    | 0.06  | 0.14  |
| $\sigma_{\epsilon}$   | 0.16   | 0.15  | 0.18  | 0.18     | 0.17  | 0.20  | 0.28    | 0.25  | 0.30  |
| $\nu$                 | 5.34   | 3.61  | 8.15  | 13.21    | 5.86  | 31.94 | 14.43   | 6.23  | 35.68 |

**Fig. 2** Relationship between three intestinal traits and trophic level for: 142 species of coral reef fishes with a minimum sample size of three individuals per species (a, d, g); 122 species of coral reef fishes with a minimum sample size of three individuals per species (b, e, h); and 69 species of coral reef fishes with a minimum sample size of eight individuals per species (c, f, i). Thick, darkened lines represent the mean predicted fits of Bayesian phylogenetic hierarchical linear models after controlling for the remaining fixed and random effects. Categorical variables were set to their most common value (stomach = present, durophagy = non-durophagous). Thin lines represent 1,000 draws randomly chosen from the posterior fits and show model fit uncertainty. Model predictions are for natural-log intestinal traits, but are transformed here to show the fitted function on the original scale of the data. Raw data are displayed as marks along the x-axis.

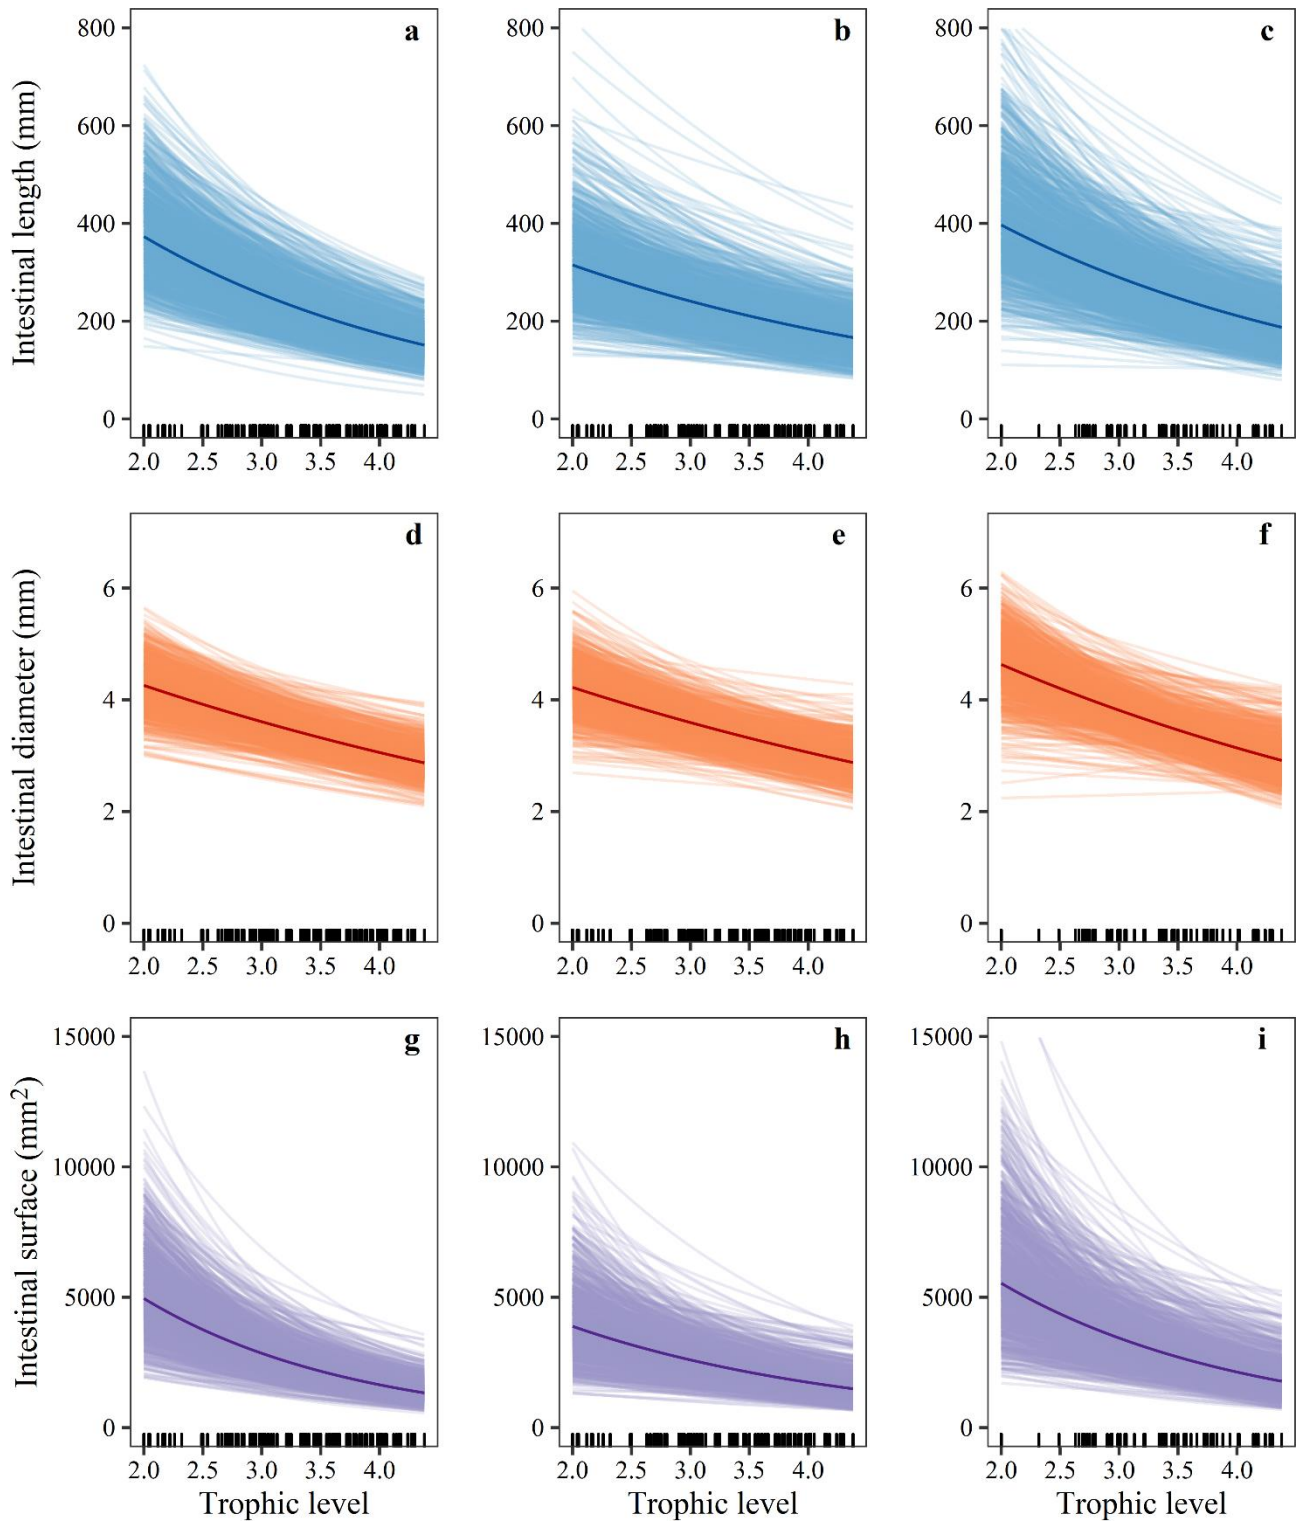

**Fig. 3** Effects of stomach presence and durophagous diet on three intestinal traits for: 142 species of coral reef fishes with a minimum sample size of three individuals per species (a, b, c); 122 species of coral reef fishes with a minimum sample size of three individuals per species (d, e, f); and 69 species of coral reef fishes with a minimum sample size of eight individuals per species (g, h, i). Estimates are posterior medians (circles), 50% credible intervals (CIs; thick lines) and 95% CIs (thin lines) from Bayesian phylogenetic



hierarchical linear models after controlling for the remaining fixed and random effects. Posterior densities are also displayed (shaded regions).

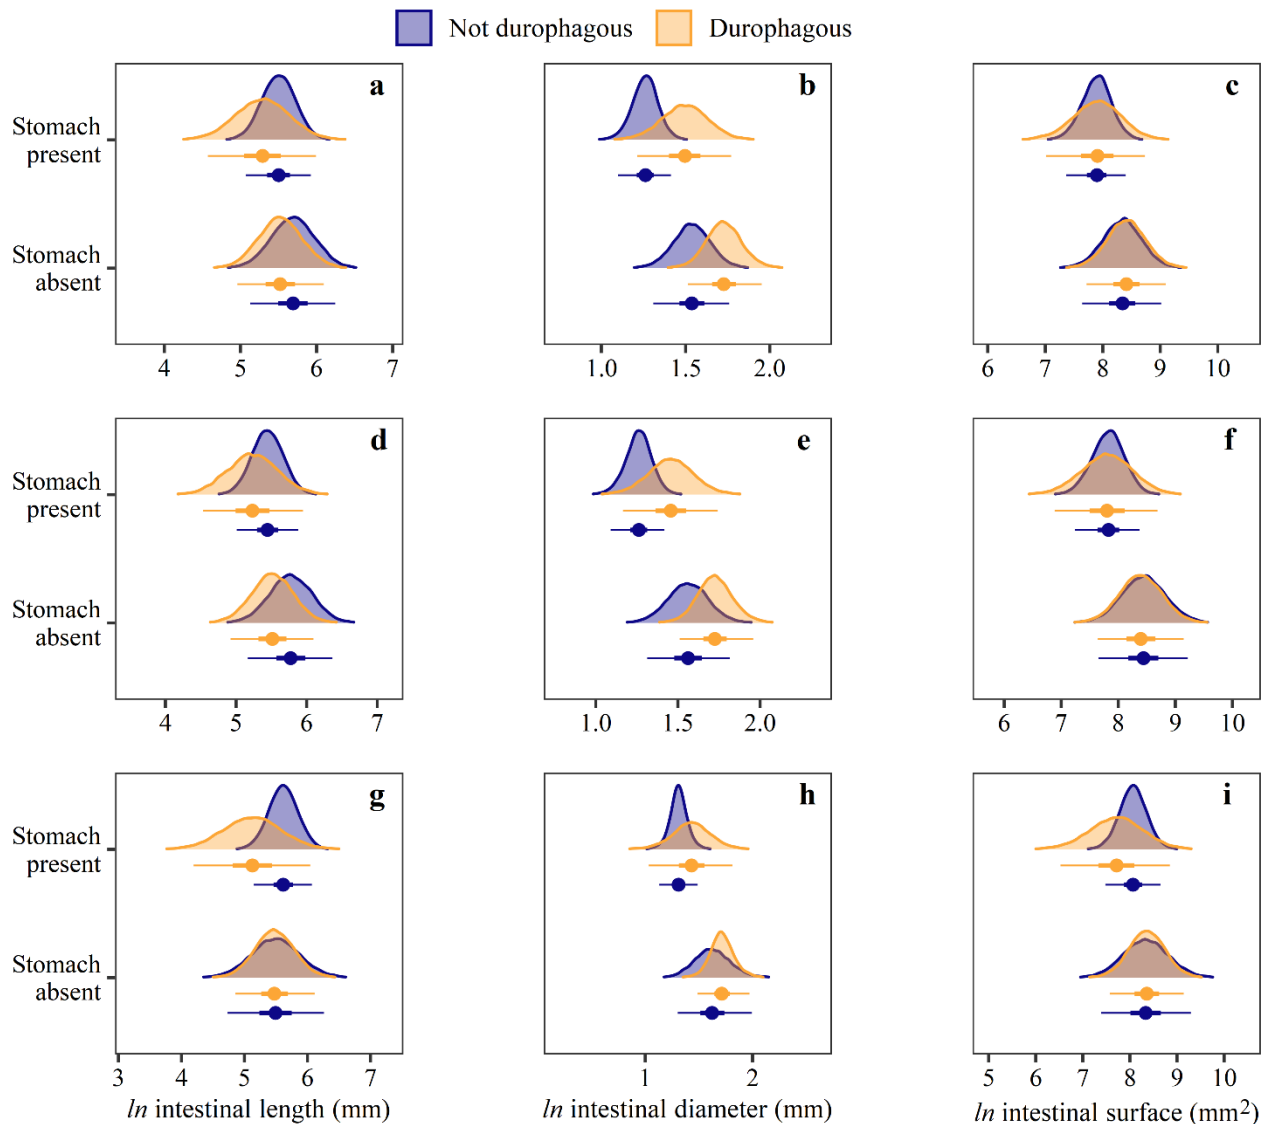

**Table 5** Species-specific scaling parameters of three natural-log intestinal traits (intestinal length, diameter, and surface area) against natural-log fish standard length for 142 species of coral reef fishes. Estimates are posterior medians and 95% credible intervals (CIs) from Bayesian phylogenetic hierarchical linear models. Values in bold were selected based on a minimum number of ten sampled individuals, covering a length range of at least a quarter of the reported maximum length (retrieved from FishBase), and a posterior 95% CI above zero to provide reliable estimates of scaling parameters within the observed size range (see Fig. 5 in the main manuscript). The remaining estimates cannot be considered reliable. n = number of sampled individuals; TL = total length.

| Family         | Species                         | Length slope             | Diameter slope           | Surface slope            | n  | TL range (mm) |
|----------------|---------------------------------|--------------------------|--------------------------|--------------------------|----|---------------|
| Acanthuridae   | <i>Acanthurus achilles</i>      | <b>1.17 (0.61, 1.68)</b> | <b>1.06 (0.57, 1.69)</b> | <b>2.50 (1.52, 3.43)</b> | 12 | 122-222       |
| Acanthuridae   | <i>Acanthurus guttatus</i>      | 0.83 (0.17, 1.52)        | 0.67 (0.08, 1.20)        | 1.46 (0.34, 2.54)        | 9  | 161-198       |
| Acanthuridae   | <i>Acanthurus lineatus</i>      | 0.68 (0.11, 1.24)        | 0.69 (0.15, 1.18)        | 1.34 (0.38, 2.29)        | 9  | 160-252       |
| Acanthuridae   | <i>Acanthurus nigricans</i>     | <b>0.93 (0.65, 1.24)</b> | <b>0.77 (0.47, 1.08)</b> | <b>1.74 (1.23, 2.26)</b> | 13 | 82-184        |
| Acanthuridae   | <i>Acanthurus nigrofuscus</i>   | 0.71 (0.15, 1.28)        | 0.70 (0.21, 1.19)        | 1.39 (0.45, 2.33)        | 6  | 109-176       |
| Acanthuridae   | <i>Acanthurus nigros</i>        | 0.75 (0.03, 1.45)        | 0.59 (-0.02, 1.10)       | 1.14 (-0.01, 2.22)       | 4  | 119-156       |
| Acanthuridae   | <i>Acanthurus olivaceus</i>     | 0.80 (0.07, 1.54)        | 0.71 (0.11, 1.29)        | 1.49 (0.25, 2.70)        | 6  | 220-271       |
| Acanthuridae   | <i>Acanthurus pyroferus</i>     | 0.60 (-0.22, 1.33)       | 0.73 (0.13, 1.35)        | 1.30 (0.03, 2.53)        | 5  | 130-155       |
| Acanthuridae   | <i>Acanthurus thompsoni</i>     | 0.73 (-0.03, 1.46)       | 0.69 (0.08, 1.27)        | 1.32 (0.02, 2.55)        | 4  | 192-209       |
| Acanthuridae   | <i>Acanthurus triostegus</i>    | 0.76 (0.09, 1.43)        | 0.70 (0.13, 1.25)        | 1.47 (0.34, 2.59)        | 15 | 140-166       |
| Acanthuridae   | <i>Ctenochaetus flavicauda</i>  | 0.75 (0.02, 1.46)        | 0.67 (0.05, 1.23)        | 1.34 (0.12, 2.53)        | 6  | 108-139       |
| Acanthuridae   | <i>Ctenochaetus striatus</i>    | 0.91 (0.31, 1.53)        | 0.54 (-0.07, 1.02)       | 1.32 (0.31, 2.32)        | 5  | 120-215       |
| Acanthuridae   | <i>Naso brevirostris</i>        | 0.94 (0.38, 1.49)        | 0.74 (0.25, 1.24)        | 1.71 (0.77, 2.63)        | 6  | 224-343       |
| Acanthuridae   | <i>Naso lituratus</i>           | <b>0.90 (0.33, 1.47)</b> | 0.53 (-0.02, 0.98)       | <b>1.22 (0.32, 2.09)</b> | 17 | 181-356       |
| Acanthuridae   | <i>Naso unicornis</i>           | 1.07 (0.53, 1.65)        | 0.93 (0.48, 1.51)        | 2.16 (1.25, 3.14)        | 5  | 341-670       |
| Acanthuridae   | <i>Naso vlamingii</i>           | 0.46 (-0.04, 0.97)       | 0.54 (0.00, 0.97)        | 0.85 (-0.01, 1.69)       | 5  | 276-549       |
| Acanthuridae   | <i>Zebrasoma scopas</i>         | <b>1.13 (0.91, 1.29)</b> | <b>0.84 (0.66, 1.02)</b> | <b>1.98 (1.69, 2.24)</b> | 42 | 29-177        |
| Acanthuridae   | <i>Zebrasoma velifer</i>        | 0.89 (0.26, 1.54)        | 0.58 (-0.07, 1.08)       | 1.31 (0.23, 2.37)        | 9  | 196-259       |
| Aulostomidae   | <i>Aulostomus chinensis</i>     | <b>1.24 (0.69, 1.78)</b> | <b>1.18 (0.69, 1.78)</b> | <b>2.71 (1.82, 3.62)</b> | 11 | 365-623       |
| Balistidae     | <i>Balistapus undulatus</i>     | <b>0.51 (0.11, 0.89)</b> | <b>0.79 (0.44, 1.16)</b> | <b>1.27 (0.63, 1.89)</b> | 12 | 125-267       |
| Balistidae     | <i>Melichthys niger</i>         | <b>1.12 (0.70, 1.57)</b> | <b>0.81 (0.44, 1.23)</b> | <b>1.88 (1.20, 2.61)</b> | 14 | 125-258       |
| Balistidae     | <i>Melichthys vidua</i>         | 0.71 (0.08, 1.32)        | 0.79 (0.31, 1.34)        | 1.47 (0.52, 2.44)        | 12 | 176-225       |
| Balistidae     | <i>Odonus niger</i>             | 0.47 (-0.13, 1.04)       | 0.59 (0.06, 1.06)        | 0.94 (-0.04, 1.87)       | 14 | 158-277       |
| Balistidae     | <i>Rhinecanthus aculeatus</i>   | 0.46 (-0.15, 1.05)       | 0.71 (0.22, 1.20)        | 1.12 (0.20, 2.01)        | 9  | 145-222       |
| Balistidae     | <i>Rhinecanthus lunula</i>      | 0.79 (0.02, 1.54)        | 0.72 (0.12, 1.32)        | 1.51 (0.26, 2.78)        | 3  | 251-258       |
| Balistidae     | <i>Rhinecanthus rectangulus</i> | 0.55 (0.04, 1.06)        | 0.71 (0.28, 1.15)        | 1.21 (0.42, 2.01)        | 9  | 117-195       |
| Balistidae     | <i>Sufflamen bursa</i>          | 0.53 (-0.05, 1.11)       | <b>0.61 (0.09, 1.07)</b> | 0.93 (-0.03, 1.85)       | 12 | 118-182       |
| Blenniidae     | <i>Exallias brevis</i>          | 0.95 (0.25, 1.69)        | 0.77 (0.21, 1.40)        | 1.81 (0.62, 3.05)        | 5  | 99-120        |
| Bothidae       | <i>Bothus mancus</i>            | 0.77 (0.02, 1.49)        | 0.68 (0.04, 1.26)        | 1.39 (0.12, 2.61)        | 3  | 366-405       |
| Carangidae     | <i>Caranx melampygus</i>        | 0.66 (0.11, 1.23)        | 0.65 (0.13, 1.13)        | 1.25 (0.33, 2.17)        | 5  | 349-545       |
| Carangidae     | <i>Scomberoides lysan</i>       | 0.78 (0.07, 1.47)        | 0.57 (-0.15, 1.11)       | 1.11 (-0.18, 2.31)       | 3  | 356-409       |
| Chaetodontidae | <i>Chaetodon auriga</i>         | 0.70 (-0.10, 1.44)       | 0.62 (-0.01, 1.18)       | 1.21 (-0.10, 2.43)       | 9  | 145-205       |
| Chaetodontidae | <i>Chaetodon bennetti</i>       | 0.77 (-0.01, 1.53)       | 0.71 (0.12, 1.31)        | 1.45 (0.15, 2.74)        | 3  | 151-168       |
| Chaetodontidae | <i>Chaetodon citrinellus</i>    | 0.77 (0.02, 1.47)        | 0.77 (0.21, 1.39)        | 1.52 (0.32, 2.70)        | 7  | 96-113        |
| Chaetodontidae | <i>Chaetodon ephippium</i>      | 0.91 (0.21, 1.62)        | 0.62 (-0.03, 1.15)       | 1.35 (0.11, 2.54)        | 8  | 157-194       |
| Chaetodontidae | <i>Chaetodon lunula</i>         | 0.98 (0.40, 1.55)        | 0.57 (-0.02, 1.03)       | 1.24 (0.25, 2.19)        | 9  | 130-175       |
| Chaetodontidae | <i>Chaetodon lunulatus</i>      | 1.14 (0.39, 1.89)        | 0.60 (0.08, 1.06)        | 1.84 (0.88, 2.79)        | 8  | 85-135        |
| Chaetodontidae | <i>Chaetodon mertensii</i>      | 0.56 (-0.21, 1.28)       | 0.68 (0.08, 1.24)        | 1.08 (-0.23, 2.26)       | 5  | 103-129       |
| Chaetodontidae | <i>Chaetodon ornatissimus</i>   | <b>1.39 (1.11, 1.67)</b> | <b>0.56 (0.25, 0.85)</b> | <b>1.92 (1.45, 2.39)</b> | 29 | 70-149        |
| Chaetodontidae | <i>Chaetodon pelewensis</i>     | 0.81 (0.12, 1.49)        | 0.76 (0.19, 1.38)        | 1.61 (0.42, 2.82)        | 6  | 75-92         |

| Family         | Species                            | Length slope             | Diameter slope           | Surface slope            | n  | TL range (mm) |
|----------------|------------------------------------|--------------------------|--------------------------|--------------------------|----|---------------|
| Chaetodontidae | <i>Chaetodon quadrimaculatus</i>   | 0.76 (0.08, 1.43)        | 0.68 (0.11, 1.21)        | 1.40 (0.32, 2.45)        | 8  | 97-129        |
| Chaetodontidae | <i>Chaetodon reticulatus</i>       | 1.04 (0.60, 1.49)        | 0.79 (0.37, 1.24)        | 1.87 (1.14, 2.62)        | 32 | 86-130        |
| Chaetodontidae | <i>Chaetodon trichrous</i>         | 0.95 (0.25, 1.69)        | 0.74 (0.16, 1.34)        | 1.72 (0.54, 2.94)        | 6  | 102-120       |
| Chaetodontidae | <i>Chaetodon trifascialis</i>      | 0.97 (0.21, 1.77)        | 0.77 (0.20, 1.39)        | 1.91 (0.72, 3.17)        | 6  | 111-147       |
| Chaetodontidae | <i>Chaetodon ulietensis</i>        | 0.68 (-0.08, 1.39)       | 0.67 (0.05, 1.22)        | 1.27 (0.02, 2.44)        | 8  | 134-158       |
| Chaetodontidae | <i>Chaetodon unimaculatus</i>      | 0.42 (-0.22, 1.01)       | 0.58 (0.02, 1.06)        | 0.88 (-0.19, 1.86)       | 9  | 18-143        |
| Chaetodontidae | <i>Chaetodon vagabundus</i>        | 0.53 (-0.25, 1.23)       | 0.69 (0.11, 1.25)        | 1.11 (-0.13, 2.21)       | 13 | 125-151       |
| Chaetodontidae | <i>Forcipiger flavissimus</i>      | 0.80 (0.06, 1.50)        | 0.73 (0.14, 1.33)        | 1.52 (0.32, 2.70)        | 8  | 142-176       |
| Chaetodontidae | <i>Forcipiger longirostris</i>     | 0.79 (0.08, 1.49)        | 0.74 (0.17, 1.33)        | 1.57 (0.38, 2.74)        | 7  | 170-222       |
| Chaetodontidae | <i>Hemitaurichthys polylepis</i>   | 1.15 (0.56, 1.76)        | 0.88 (0.40, 1.50)        | 2.24 (1.23, 3.30)        | 7  | 97-140        |
| Chaetodontidae | <i>Heniochus chrysostomus</i>      | 1.24 (0.53, 2.05)        | 0.70 (0.13, 1.25)        | 2.08 (1.00, 3.26)        | 8  | 110-142       |
| Cirrhitidae    | <i>Cirrhitus pinnulatus</i>        | 0.93 (0.39, 1.44)        | 0.72 (0.23, 1.20)        | 1.66 (0.74, 2.58)        | 10 | 126-190       |
| Cirrhitidae    | <i>Paracirrhites forsteri</i>      | 0.64 (0.06, 1.25)        | 0.67 (0.15, 1.16)        | 1.24 (0.27, 2.21)        | 9  | 124-183       |
| Cirrhitidae    | <i>Paracirrhites hemistictus</i>   | 0.86 (0.30, 1.43)        | 0.63 (0.09, 1.12)        | 1.45 (0.48, 2.40)        | 18 | 162-221       |
| Diodontidae    | <i>Diodon hystrix</i>              | 0.74 (0.06, 1.39)        | 0.81 (0.29, 1.44)        | 1.69 (0.59, 2.82)        | 5  | 300-404       |
| Fistulariidae  | <i>Fistularia commersonii</i>      | <b>1.07 (0.60, 1.56)</b> | <b>0.95 (0.54, 1.45)</b> | <b>2.20 (1.41, 3.00)</b> | 10 | 558-985       |
| Gobiidae       | <i>Valenciennea strigata</i>       | 1.14 (0.48, 1.81)        | 0.61 (0.04, 1.09)        | 1.67 (0.67, 2.66)        | 6  | 120-167       |
| Hemiramphidae  | <i>Hemiramphus depauperatus</i>    | 0.87 (0.11, 1.64)        | 0.70 (0.07, 1.29)        | 1.55 (0.23, 2.82)        | 3  | 230-271       |
| Holocentridae  | <i>Myripristis berndti</i>         | <b>0.87 (0.39, 1.33)</b> | 0.40 (-0.07, 0.79)       | <b>0.96 (0.20, 1.72)</b> | 16 | 120-260       |
| Holocentridae  | <i>Myripristis kuntee</i>          | 1.00 (0.35, 1.67)        | 0.49 (-0.20, 0.99)       | 1.10 (-0.01, 2.14)       | 7  | 139-178       |
| Holocentridae  | <i>Myripristis violacea</i>        | 0.99 (0.29, 1.71)        | 0.79 (0.25, 1.39)        | 1.85 (0.75, 3.01)        | 9  | 170-213       |
| Holocentridae  | <i>Neoniphon sammara</i>           | <b>0.71 (0.07, 1.35)</b> | <b>0.58 (0.05, 1.03)</b> | <b>1.75 (0.91, 2.58)</b> | 12 | 141-222       |
| Holocentridae  | <i>Sargocentron caudimaculatum</i> | 0.95 (0.34, 1.56)        | 0.82 (0.32, 1.42)        | 1.93 (0.89, 3.01)        | 7  | 142-192       |
| Holocentridae  | <i>Sargocentron spiniferum</i>     | 0.91 (0.28, 1.55)        | 0.89 (0.39, 1.53)        | 1.94 (0.92, 3.00)        | 10 | 212-285       |
| Holocentridae  | <i>Sargocentron tiere</i>          | <b>0.86 (0.17, 1.56)</b> | <b>0.67 (0.07, 1.22)</b> | <b>1.54 (0.37, 2.70)</b> | 11 | 190-312       |
| Kuhliidae      | <i>Kuhlia mugil</i>                | 0.90 (0.15, 1.68)        | 0.70 (0.08, 1.31)        | 1.60 (0.36, 2.86)        | 3  | 251-282       |
| Kyphosidae     | <i>Kyphosus cinerascens</i>        | 0.84 (0.08, 1.60)        | 0.73 (0.13, 1.35)        | 1.59 (0.36, 2.87)        | 3  | 365-395       |
| Kyphosidae     | <i>Kyphosus vaigiensis</i>         | 0.83 (0.26, 1.39)        | 0.71 (0.20, 1.24)        | 1.54 (0.58, 2.51)        | 4  | 266-425       |
| Labridae       | <i>Calotomus carolinus</i>         | 0.67 (0.16, 1.17)        | 0.52 (-0.02, 0.95)       | 1.04 (0.17, 1.89)        | 9  | 261-410       |
| Labridae       | <i>Cheilinus chlorourus</i>        | 0.51 (-0.08, 1.08)       | 0.69 (0.18, 1.19)        | 1.15 (0.19, 2.09)        | 9  | 150-241       |
| Labridae       | <i>Cheilinus trilobatus</i>        | 1.18 (0.65, 1.70)        | 1.00 (0.54, 1.59)        | 2.39 (1.48, 3.29)        | 7  | 131-247       |
| Labridae       | <i>Cheilio inermis</i>             | 0.89 (0.17, 1.62)        | 0.81 (0.26, 1.47)        | 1.85 (0.65, 3.15)        | 4  | 322-391       |
| Labridae       | <i>Chlorurus microrrhinos</i>      | 0.80 (0.06, 1.53)        | 0.69 (0.07, 1.28)        | 1.45 (0.20, 2.68)        | 4  | 360-390       |
| Labridae       | <i>Chlorurus spilurus</i>          | 0.58 (-0.12, 1.23)       | 0.90 (0.40, 1.56)        | 1.61 (0.51, 2.71)        | 6  | 187-475       |
| Labridae       | <i>Coris aygula</i>                | 1.00 (0.59, 1.40)        | 0.62 (0.22, 0.99)        | 1.59 (0.93, 2.23)        | 9  | 197-435       |
| Labridae       | <i>Coris gaimard</i>               | 1.01 (0.44, 1.52)        | 0.76 (0.31, 1.22)        | 1.76 (0.94, 2.58)        | 7  | 149-287       |
| Labridae       | <i>Epibulus insidiator</i>         | 0.56 (-0.08, 1.18)       | 0.66 (0.18, 1.11)        | 1.20 (0.36, 2.04)        | 16 | 170-300       |
| Labridae       | <i>Gomphosus varius</i>            | 0.93 (0.36, 1.50)        | 0.56 (-0.03, 1.05)       | 1.31 (0.33, 2.26)        | 7  | 183-280       |
| Labridae       | <i>Halichoeres hortulanus</i>      | 0.91 (0.40, 1.42)        | 0.91 (0.46, 1.48)        | 2.02 (1.14, 2.94)        | 9  | 164-261       |

| Family        | Species                             | Length slope             | Diameter slope           | Surface slope            | n  | TL range (mm) |
|---------------|-------------------------------------|--------------------------|--------------------------|--------------------------|----|---------------|
| Labridae      | <i>Halichoeres trimaculatus</i>     | 0.78 (0.17, 1.39)        | 0.82 (0.31, 1.42)        | 1.75 (0.68, 2.84)        | 5  | 117-166       |
| Labridae      | <i>Hemigymnus fasciatus</i>         | 0.90 (0.39, 1.39)        | 0.70 (0.22, 1.17)        | 1.55 (0.73, 2.38)        | 9  | 145-229       |
| Labridae      | <i>Novaculichthys taeniourus</i>    | 0.72 (0.10, 1.32)        | 0.65 (0.08, 1.16)        | 1.28 (0.24, 2.30)        | 6  | 235-299       |
| Labridae      | <i>Oxycheilinus unifasciatus</i>    | 0.66 (-0.02, 1.33)       | 0.78 (0.25, 1.37)        | 1.53 (0.44, 2.63)        | 4  | 190-250       |
| Labridae      | <i>Scarus altipinnis</i>            | 0.70 (0.06, 1.34)        | 0.68 (0.11, 1.22)        | 1.36 (0.22, 2.45)        | 6  | 297-399       |
| Labridae      | <i>Scarus forsteni</i>              | 0.74 (0.16, 1.32)        | 0.66 (0.13, 1.13)        | 1.39 (0.40, 2.36)        | 9  | 235-382       |
| Labridae      | <i>Scarus frenatus</i>              | 0.05 (-0.53, 0.73)       | 0.66 (0.22, 1.07)        | 0.51 (-0.28, 1.29)       | 4  | 222-390       |
| Labridae      | <i>Scarus globiceps</i>             | 0.60 (-0.14, 1.27)       | 0.71 (0.19, 1.22)        | 0.87 (-0.16, 1.88)       | 7  | 196-261       |
| Labridae      | <i>Scarus oviceps</i>               | 0.85 (0.26, 1.43)        | 0.66 (0.12, 1.15)        | 1.47 (0.49, 2.44)        | 7  | 215-298       |
| Labridae      | <i>Scarus psittacus</i>             | 0.62 (0.04, 1.23)        | 0.46 (-0.10, 0.90)       | 1.10 (0.16, 2.00)        | 9  | 187-315       |
| Labridae      | <i>Scarus rubroviolaceus</i>        | 0.87 (0.20, 1.56)        | 0.96 (0.45, 1.64)        | 1.94 (0.82, 3.19)        | 5  | 255-454       |
| Labridae      | <i>Scarus schlegeli</i>             | 0.98 (0.40, 1.55)        | 0.83 (0.35, 1.39)        | 1.97 (1.02, 2.95)        | 7  | 193-301       |
| Labridae      | <i>Thalassoma hardwicke</i>         | 0.81 (0.29, 1.35)        | 0.65 (0.12, 1.11)        | 1.41 (0.49, 2.31)        | 7  | 119-202       |
| Labridae      | <i>Thalassoma purpureum</i>         | 0.91 (0.23, 1.58)        | 0.56 (-0.11, 1.08)       | 1.21 (0.05, 2.32)        | 5  | 230-287       |
| Labridae      | <i>Thalassoma trilobatum</i>        | <b>0.67 (0.10, 1.22)</b> | <b>0.60 (0.07, 1.05)</b> | <b>1.11 (0.26, 1.92)</b> | 10 | 166-284       |
| Lethrinidae   | <i>Gnathodentex aureolineatus</i>   | 0.77 (0.06, 1.46)        | 0.58 (-0.11, 1.11)       | 1.15 (-0.13, 2.33)       | 7  | 214-311       |
| Lethrinidae   | <i>Monotaxis grandoculis</i>        | 0.94 (0.31, 1.65)        | 0.55 (0.12, 0.92)        | 1.79 (0.92, 2.60)        | 7  | 158-365       |
| Lutjanidae    | <i>Aphareus furca</i>               | 0.84 (0.32, 1.36)        | 0.90 (0.46, 1.44)        | 1.81 (0.96, 2.67)        | 9  | 239-366       |
| Lutjanidae    | <i>Lutjanus fulvus</i>              | 1.31 (0.80, 1.80)        | 0.81 (0.39, 1.29)        | 2.19 (1.38, 3.02)        | 11 | 173-265       |
| Lutjanidae    | <i>Lutjanus kasmira</i>             | 0.89 (0.19, 1.60)        | 0.69 (0.09, 1.24)        | 1.54 (0.38, 2.68)        | 9  | 209-265       |
| Lutjanidae    | <i>Lutjanus monostigma</i>          | 0.88 (0.34, 1.39)        | 0.82 (0.35, 1.34)        | 1.77 (0.80, 2.69)        | 5  | 263-572       |
| Monacanthidae | <i>Aluterus scriptus</i>            | 0.68 (0.17, 1.18)        | 0.81 (0.35, 1.31)        | 1.60 (0.74, 2.46)        | 4  | 328-616       |
| Monacanthidae | <i>Amanes scopas</i>                | 0.47 (-0.08, 1.04)       | 0.67 (0.16, 1.14)        | 1.08 (0.18, 1.95)        | 9  | 104-168       |
| Monacanthidae | <i>Cantherhines sandwichiensis</i>  | 0.45 (-0.21, 1.11)       | <b>0.98 (0.50, 1.62)</b> | <b>1.60 (0.65, 2.55)</b> | 10 | 115-172       |
| Mugilidae     | <i>Ellochelon vaigiensis</i>        | 0.72 (-0.02, 1.44)       | 0.67 (0.04, 1.24)        | 1.32 (0.06, 2.52)        | 4  | 340-398       |
| Mullidae      | <i>Mulloidichthys flavolineatus</i> | 1.16 (0.63, 1.70)        | 0.69 (0.20, 1.18)        | 1.81 (0.93, 2.73)        | 9  | 194-319       |
| Mullidae      | <i>Mulloidichthys vanicolensis</i>  | 1.07 (0.49, 1.62)        | 0.92 (0.44, 1.51)        | 2.17 (1.19, 3.14)        | 5  | 187-297       |
| Mullidae      | <i>Parupeneus barberinus</i>        | 0.76 (0.35, 1.19)        | 0.81 (0.41, 1.22)        | 1.62 (0.93, 2.32)        | 4  | 200-440       |
| Mullidae      | <i>Parupeneus insularis</i>         | <b>0.84 (0.46, 1.22)</b> | <b>0.69 (0.30, 1.07)</b> | <b>1.51 (0.86, 2.18)</b> | 11 | 161-365       |
| Mullidae      | <i>Parupeneus multifasciatus</i>    | <b>0.95 (0.52, 1.37)</b> | <b>0.93 (0.51, 1.42)</b> | <b>2.01 (1.23, 2.77)</b> | 11 | 139-298       |
| Ostraciidae   | <i>Ostracion cubicus</i>            | 0.98 (0.25, 1.74)        | 0.67 (0.04, 1.23)        | 1.61 (0.41, 2.82)        | 3  | 244-298       |
| Ostraciidae   | <i>Ostracion meleagris</i>          | 0.59 (-0.01, 1.22)       | 0.66 (0.12, 1.15)        | 1.17 (0.22, 2.15)        | 7  | 90-121        |
| Pempheridae   | <i>Pempheris oualensis</i>          | 0.65 (-0.09, 1.34)       | 0.73 (0.15, 1.32)        | 1.37 (0.16, 2.53)        | 7  | 192-216       |
| Pinguipedidae | <i>Parapercis millepunctata</i>     | 0.96 (0.31, 1.63)        | 0.80 (0.27, 1.42)        | 1.87 (0.76, 3.02)        | 7  | 114-145       |
| Pomacanthidae | <i>Centropyge flavissima</i>        | 1.21 (0.76, 1.66)        | 0.76 (0.36, 1.19)        | 2.03 (1.31, 2.75)        | 8  | 55-101        |
| Pomacanthidae | <i>Centropyge loriculus</i>         | 1.01 (0.28, 1.77)        | 0.80 (0.24, 1.44)        | 1.94 (0.80, 3.18)        | 3  | 50-64         |
| Pomacanthidae | <i>Pomacanthus imperator</i>        | 0.93 (0.30, 1.54)        | 0.94 (0.47, 1.56)        | 1.99 (0.97, 3.02)        | 7  | 197-281       |
| Pomacanthidae | <i>Pygoplites diacanthus</i>        | <b>1.33 (0.70, 2.03)</b> | <b>0.86 (0.39, 1.42)</b> | <b>2.36 (1.37, 3.38)</b> | 10 | 103-221       |

| Family         | Species                                 | Length slope             | Diameter slope           | Surface slope            | n  | TL range (mm) |
|----------------|-----------------------------------------|--------------------------|--------------------------|--------------------------|----|---------------|
| Pomacentridae  | <i>Abudefduf septemfasciatus</i>        | 0.87 (0.18, 1.56)        | 0.73 (0.16, 1.29)        | 1.58 (0.46, 2.73)        | 11 | 161-194       |
| Pomacentridae  | <i>Abudefduf sexfasciatus</i>           | 0.93 (0.31, 1.57)        | 0.88 (0.38, 1.53)        | 2.07 (1.03, 3.19)        | 9  | 129-168       |
| Pomacentridae  | <i>Abudefduf sordidus</i>               | 0.69 (0.04, 1.32)        | 0.56 (-0.05, 1.04)       | 1.15 (0.09, 2.13)        | 6  | 147-228       |
| Pomacentridae  | <i>Chromis atripectoralis</i>           | 0.94 (0.24, 1.66)        | 0.72 (0.13, 1.30)        | 1.66 (0.52, 2.83)        | 5  | 54-68         |
| Pomacentridae  | <i>Chromis xanthurus</i>                | <b>0.61 (0.15, 1.08)</b> | <b>0.77 (0.36, 1.22)</b> | <b>1.46 (0.68, 2.24)</b> | 24 | 111-158       |
| Pomacentridae  | <i>Dascyllus aruanus</i>                | 1.40 (0.92, 1.88)        | 0.71 (0.30, 1.11)        | 2.17 (1.46, 2.90)        | 7  | 29-54         |
| Pomacentridae  | <i>Dascyllus flavicaudus</i>            | 0.71 (0.20, 1.23)        | 0.50 (-0.03, 0.92)       | 0.96 (0.10, 1.79)        | 14 | 75-110        |
| Pomacentridae  | <i>Dascyllus trimaculatus</i>           | 0.74 (-0.03, 1.47)       | 0.65 (0.01, 1.22)        | 1.27 (0.00, 2.46)        | 8  | 120-135       |
| Pomacentridae  | <i>Plectroglyphidodon johnstonianus</i> | 0.86 (0.14, 1.59)        | 0.79 (0.23, 1.42)        | 1.74 (0.58, 2.95)        | 6  | 59-76         |
| Pomacentridae  | <i>Plectroglyphidodon lacrymatus</i>    | 1.19 (0.60, 1.80)        | 0.71 (0.22, 1.20)        | 1.98 (1.07, 2.94)        | 6  | 50-91         |
| Pomacentridae  | <i>Stegastes fasciolatus</i>            | 0.78 (0.06, 1.47)        | 0.57 (-0.09, 1.11)       | 1.19 (-0.05, 2.33)       | 9  | 79-96         |
| Pomacentridae  | <i>Stegastes nigricans</i>              | 0.76 (0.01, 1.48)        | 0.76 (0.16, 1.38)        | 1.59 (0.35, 2.84)        | 10 | 120-141       |
| Scorpaenidae   | <i>Pterois radiata</i>                  | 0.62 (0.14, 1.10)        | 0.62 (0.20, 1.01)        | 1.14 (0.41, 1.85)        | 9  | 117-197       |
| Serranidae     | <i>Cephalopholis argus</i>              | 0.85 (0.35, 1.33)        | 0.75 (0.32, 1.21)        | 1.60 (0.80, 2.39)        | 17 | 180-310       |
| Serranidae     | <i>Cephalopholis urodeta</i>            | <b>0.74 (0.21, 1.38)</b> | <b>0.49 (0.01, 0.90)</b> | <b>1.03 (0.27, 1.85)</b> | 14 | 105-191       |
| Serranidae     | <i>Epinephelus fasciatus</i>            | 0.62 (-0.03, 1.24)       | 0.65 (0.10, 1.16)        | 1.19 (0.16, 2.20)        | 6  | 190-288       |
| Serranidae     | <i>Epinephelus hexagonatus</i>          | 0.97 (0.36, 1.58)        | 0.76 (0.24, 1.32)        | 1.88 (0.86, 2.91)        | 7  | 152-225       |
| Serranidae     | <i>Epinephelus merra</i>                | 0.85 (0.25, 1.44)        | 0.88 (0.39, 1.49)        | 1.89 (0.89, 2.94)        | 9  | 165-230       |
| Serranidae     | <i>Pseudanthias pascalus</i>            | 0.67 (0.13, 1.22)        | 0.80 (0.30, 1.34)        | 1.56 (0.61, 2.48)        | 7  | 89-152        |
| Serranidae     | <i>Variola louti</i>                    | 0.76 (0.24, 1.33)        | 0.61 (0.06, 1.08)        | 1.26 (0.34, 2.20)        | 7  | 304-420       |
| Siganidae      | <i>Siganus spinus</i>                   | 0.67 (0.05, 1.26)        | 0.80 (0.28, 1.38)        | 1.56 (0.52, 2.59)        | 5  | 192-223       |
| Tetraodontidae | <i>Arothron meleagris</i>               | 0.63 (0.16, 1.15)        | 0.88 (0.47, 1.35)        | 1.60 (0.89, 2.34)        | 9  | 141-269       |
| Tetraodontidae | <i>Canthigaster bennetti</i>            | 0.72 (-0.08, 1.47)       | 0.75 (0.16, 1.37)        | 1.41 (0.16, 2.62)        | 3  | 79-94         |
| Tetraodontidae | <i>Canthigaster solandri</i>            | 0.66 (-0.02, 1.32)       | 0.72 (0.16, 1.27)        | 1.33 (0.24, 2.40)        | 6  | 70-97         |
| Zanclidae      | <i>Zanclus cornutus</i>                 | 0.77 (0.13, 1.41)        | 0.77 (0.24, 1.36)        | 1.61 (0.52, 2.70)        | 11 | 131-171       |

**Fig. 4** Effect of phylogeny on three intestinal traits for 142 species of coral reef fishes. Estimates are posterior medians (circles), 50% credible intervals (CIs; thick lines) and 95% CIs (thin lines) from Bayesian phylogenetic hierarchical linear models, and represent deviations from the global intercept on natural-log scale.

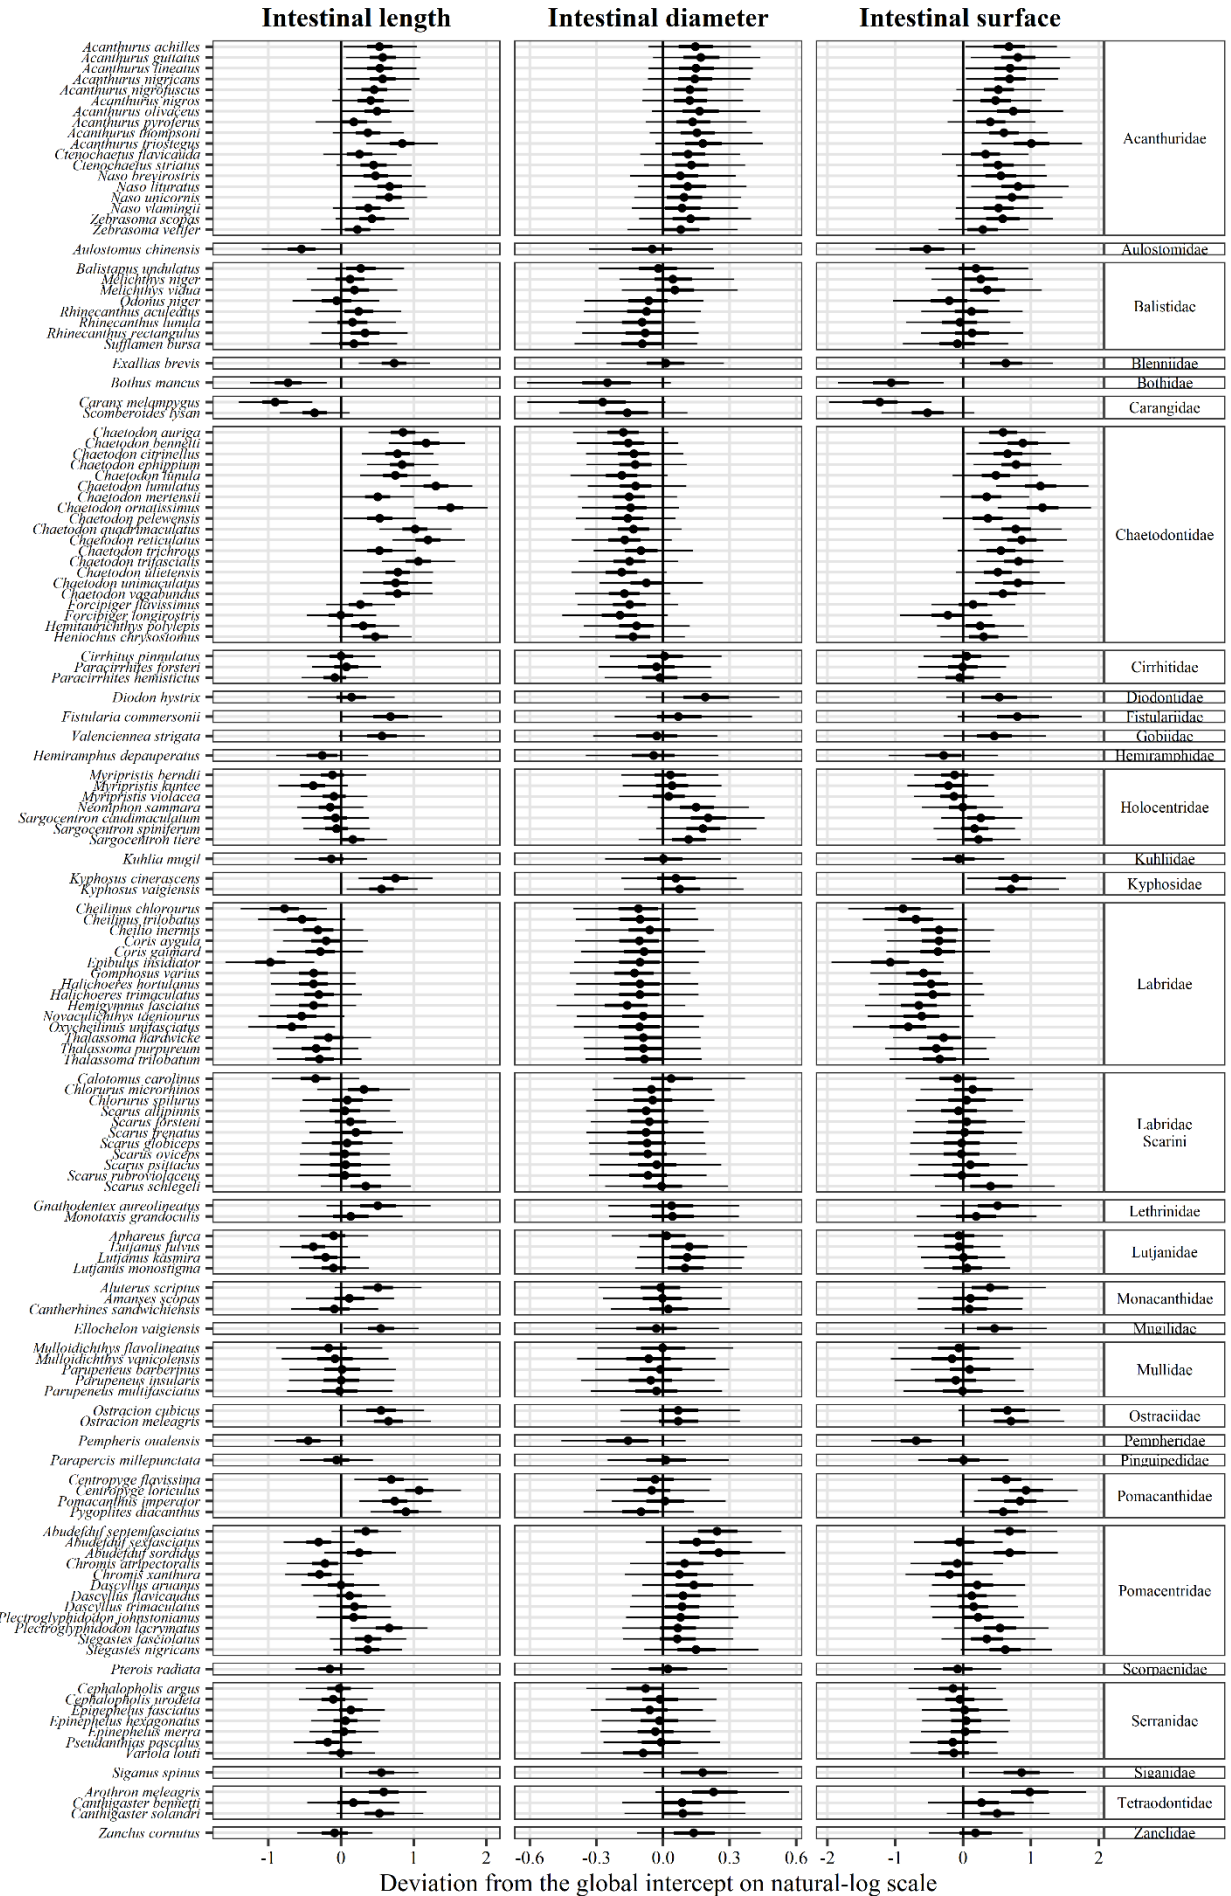

Supplement: ECE3-11-13218-s002.pdf [file ECE3-11-13218-s002.pdf]
